# Supplementary material for: Management of Renovascular Hypertension and Renal Denervation in Patients with Hypertension: An Italian Nationwide Survey
Source: Springer Nature journal article supplement (doi:10.1007/s40292-024-00668-8), 2024-09-18
Supplement: MOESM1 [file 40292_2024_668_MOESM1_ESM.docx]

**Management of renovascular hypertension and renal denervation in patients with hypertension: an Italian nationwide survey**

**Supplementary**

| **Survey on Management of Renovascular Hypertension, Fibromuscular Dysplasia, and Renal Denervation** |
| --- |
| *(1) What is your specialty?*   1. Internal Medicine 2. Nephrology 3. Cardiology 4. Endocrinology 5. Other, specify |
| *(2) What is the average number of patients with hypertension seen in your service/centre in 1 year?* |
| *(3) How many patients are seen as first visit?* |
| *(4) What is the percentage of patients with resistant hypertension seen in your service/centre?* |
| *(5) How many cases of renovascular hypertension (RVH) have been diagnosed per year on average in the last 5 years?* N = … |
| *(6) Which of the following patients, younger than 40 years, do you screen with a renal duplex ultrasound?*  *(you can indicate more than one category)*   1. All patients with hypertension 2. Only female patients with hypertension 3. Hypertensive patients with abdominal bruit 4. Patients with reduced kidney function and/or renal size asymmetry 5. Patients with flash pulmonary oedema 6. Patients with a reduction in kidney function after therapy with ACE-I or ARBs 7. Patients with resistant hypertension |
| *(7) Which of the following patients, older than 50 years, do you screen with a renal duplex ultrasound?*  *(you can indicate more than one category)*   1. All patients with hypertension 2. Only male patients with hypertension 3. Hypertensive patients with abdominal bruit 4. Patients with reduced kidney function and/or renal size asymmetry 5. Patients with flash pulmonary oedema 6. Patients with a reduction in kidney function after therapy with ACE-I or ARBs 7. Patients with resistant hypertension 8. Patients with atherosclerotic lesions in other vascular beds (carotid, coronary, iliac, femoral) |
| *(8) How many cases of fibromuscular dysplasia (FMD) have you diagnosed in the last 5 years?* N = …… |
| *(9) Which of the following patients do you screen with a CTA or MRA of the renal arteries?*  *(you can indicate more than one category)*   1. All patients with hypertension 2. All patients with resistant hypertension 3. Only female hypertensive patients (younger than 50 years) without cardiovascular risk factors 4. All female hypertensive patients irrespective of the age and of the cardiovascular risk factors 5. Male and female hypertensive patients (younger than 50 years) without cardiovascular risk factors 6. Hypertensive patients with suspicion of renal artery stenosis 7. Hypertensive patients with intracranial and/or systemic aneurysms 8. None (only based on renal duplex ultrasound) 9. Patients with echographic diagnosis of renal artery stenosis in view of endovascular revascularization |
| *(10) Do you follow patients who have already undergone renal denervation (RDN)?*   1. No 2. Yes (patients who underwent renal denervation in other centres) N = …… 3. Yes (patients who underwent renal denervation in our centre) N = …… |
| (11) *Which of the following patients would you consider eligible for renal denervation? (you can indicate more than one category)*   1. None 2. Patients with resistant hypertension 3. Patients with intolerance to several antihypertensive drugs 4. Patients with known ad documented poor adherence to therapeutic regimen 5. Patients with uncontrolled hypertension under one or two drugs |
| *(12) Which are the most important obstacles in your centre in order to propose patients for renal denervation?*   1. Fear for complications 2. Difficulty on finding a referral specialist for the procedure 3. Disbelief in procedure efficacy 4. Lack of a national or regional consensus which standardize the algorithm of choice and treatment 5. Difficulty on evaluating treatment adherence though therapeutic drug monitoring 6. High cost of the procedure |

**Table S1.** Twelve-items questionnaire concerning screening and management of renovascular hypertension (RVH), fibromuscular dysplasia (FMD) and renal denervation (RDN).

ACE-Is = angiotensin I converting enzyme inhibitors; ARBs = angiotensin II receptor blockers; CTA = computed tomography angiography; MRA = magnetic resonance angiography

| **Geographical Areas** | **North**  (n=52) | **Centre-South**  (n=30) | ***P-*value** |
| --- | --- | --- | --- |
| *(6) Which of the following patients, younger than 40 years, do you screen with a renal duplex ultrasound?* | | | | |
| 1. All patients with hypertension 2. Only female patients with hypertension 3. Hypertensive patients with abdominal bruit 4. Patients with reduced kidney function and/or renal size asymmetry 5. Patients with flash pulmonary oedema 6. Patients with a reduction in kidney function after therapy with ACE-I or ARBs 7. Patients with resistant hypertension | 13 (25.0)  2 (3.8)  30 (57.7)  31 (59.6)  18 (34.6)  23 (44.2)  35 (67.3) | 10 (33.3)  4 (13.3)  17 (56.7)  18 (60.0)  7 (23.3)  12 (40.0)  18 (60.0) | 0.420  0.185  0.920  1.000  0.286  0.708  0.507 |
| *(7) Which of the following patients, older than 50 years, do you screen with a renal duplex ultrasound?* | | | | |
| 1. All patients with hypertension 2. Only male patients with hypertension 3. Hypertensive patients with abdominal bruit 4. Patients with reduced kidney function and/or renal size asymmetry 5. Patients with flash pulmonary oedema 6. Patients with a reduction in kidney function after therapy with ACE-I or ARBs 7. Patients with resistant hypertension 8. Patients with atherosclerotic lesions in other vascular beds (carotid, coronary …) | 3 (5.8)  0 (0.0)  35 (67.3)  36 (69.2)  26 (50.0)  28 (53.8)  42 (80.8)  28 (53.8) | 1 (3.3)  1 (3.3)  16 (53.3)  22 (73.3)  10 (33.3)  19 (63.3)  24 (80.0)  16 (53.3) | 1.000  0.366  0.209  0.699  0.143  0.403  0.920  1.000 |
| *(9) Which of the following patients do you screen with a CTA or MRA of the renal arteries?* | | | | |
| 1. All patients with hypertension 2. All patients with resistant hypertension 3. Only female hypertensive patients (< 50 years) without cardiovascular risk factors 4. All female hypertensive patients irrespective of age and of cardiovascular risk factors 5. Male and female hypertensive patients (< 50 years) without cardiovascular risk factors 6. Hypertensive patients with suspicion of renal artery stenosis 7. Hypertensive patients with intracranial and/or systemic aneurysms 8. None (only based on renal duplex ultrasound) 9. Echographic diagnosis of renal artery stenosis in view of endovascular revascularization | 0 (0.0)  8 (15.4)  1 (1.9)  0 (0.0)  5 (9.6)  41 (78.8)  17 (32.7)  5 (9.6)  32 (61.5) | 0 (0.0)  2 (6.7)  2 (6.7)  0 (0.0)  2 (6.7)  22 (73.3)  5 (16.7)  0 (0.0)  21 (70.0) | 1.000  0.312  0.551  1.000  0.711  0.572  0.130  0.153  0.439 |
| *(10) Do you follow patients who have already undergone renal denervation (RDN)?* | | | | |
| 1. No 2. Yes (patients who underwent renal denervation in other centres) 3. Yes (patients who underwent renal denervation in our centre) | 35 (67.3)  4 (7.7)  13 (25.0) | 16 (53.3)  3 (10.0)  11 (36.7) | 0.656 |
| *(11) Which of the following patients would you consider eligible for renal denervation?* | | | | |
| 1. None 2. Patients with resistant hypertension 3. Patients with intolerance to several antihypertensive drugs 4. Patients with known ad documented poor adherence to therapeutic regimen 5. Patients with uncontrolled hypertension under one or two drugs | 6 (11.5)  35 (67.3)  35 (67.3)  20 (38.5)  2 (3.8) | 3 (10.0)  22 (73.3)  20 (66.7)  12 (40.0)  4 (13.3) | 1.000  0.566  1.000  0.888  0.185 |
| *(12) Which are the most important obstacles in your centre in order to propose patients for renal denervation?* | | | | |
| 1. Fear for complications 2. Difficulty on finding a referral specialist for the procedure 3. Disbelief in procedure efficacy 4. Lack of a national or regional consensus which standardize algorithm of choice and treatment 5. Difficulty on evaluating treatment adherence though therapeutic drug monitoring 6. High cost of the procedure | 13 (25.0)  18 (34.6)  16 (30.8)  19 (36.5)  12 (23.1)  8 (15.4) | 2 (6.7)  12 (40.0)  5 (16.7)  17 (56.7)  7 (23.3)  0 (0.0) | 0.072  0.624  0.196  0.077  1.000  **0.046** |

**Table S2. Sub-analysis on geographical areas concerning screening and management of renovascular hypertension (RVH), fibromuscular dysplasia (FMD) and renal denervation (RDN).**

ACE-Is = angiotensin I converting enzyme inhibitors; ARBs = angiotensin II receptor blockers; CTA = computed tomography angiography; MRA = magnetic resonance angiography


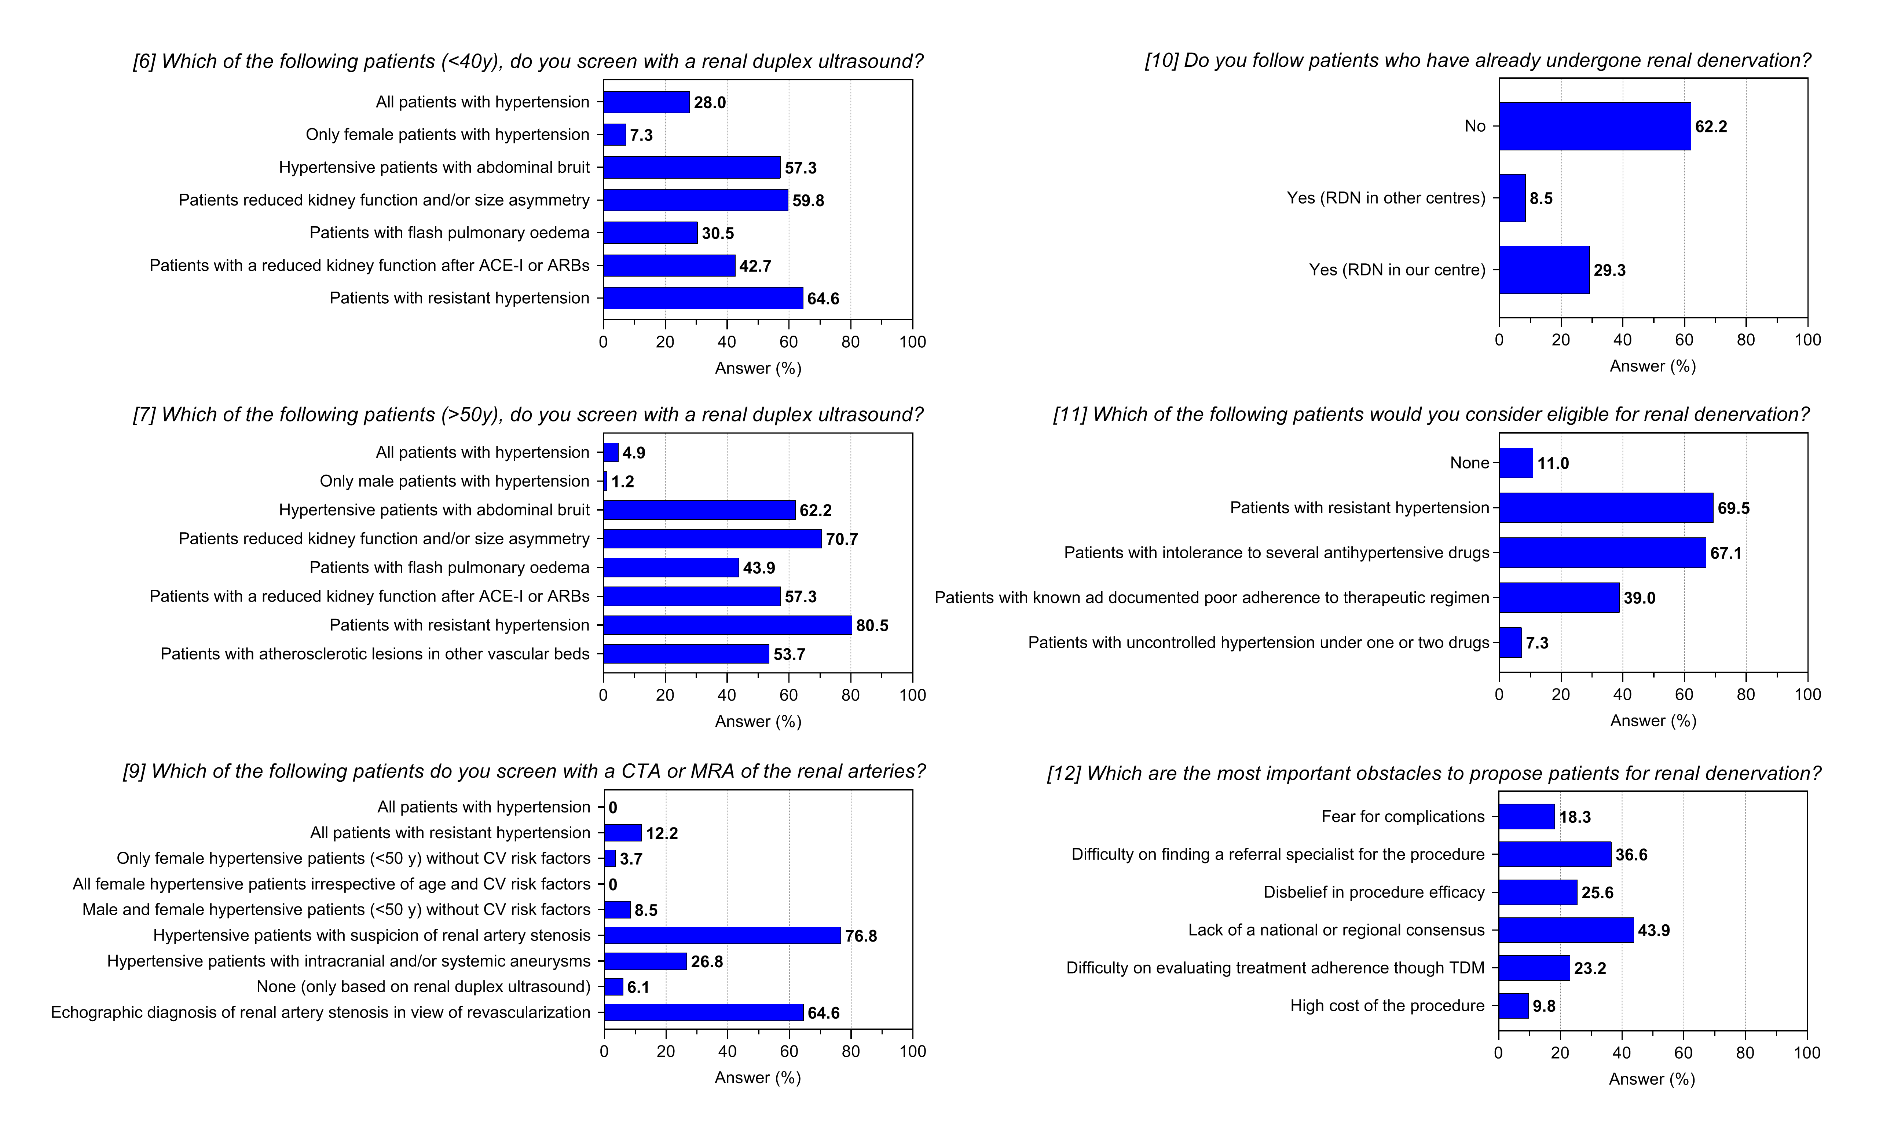


**Figure S1**. Response to questions 6-to-12 of the questionnaire for all centres.

ACE-Is = angiotensin I converting enzyme inhibitors; ARBs = angiotensin II receptor blockers; CTA = computed tomography angiography; MRA = magnetic resonance angiography


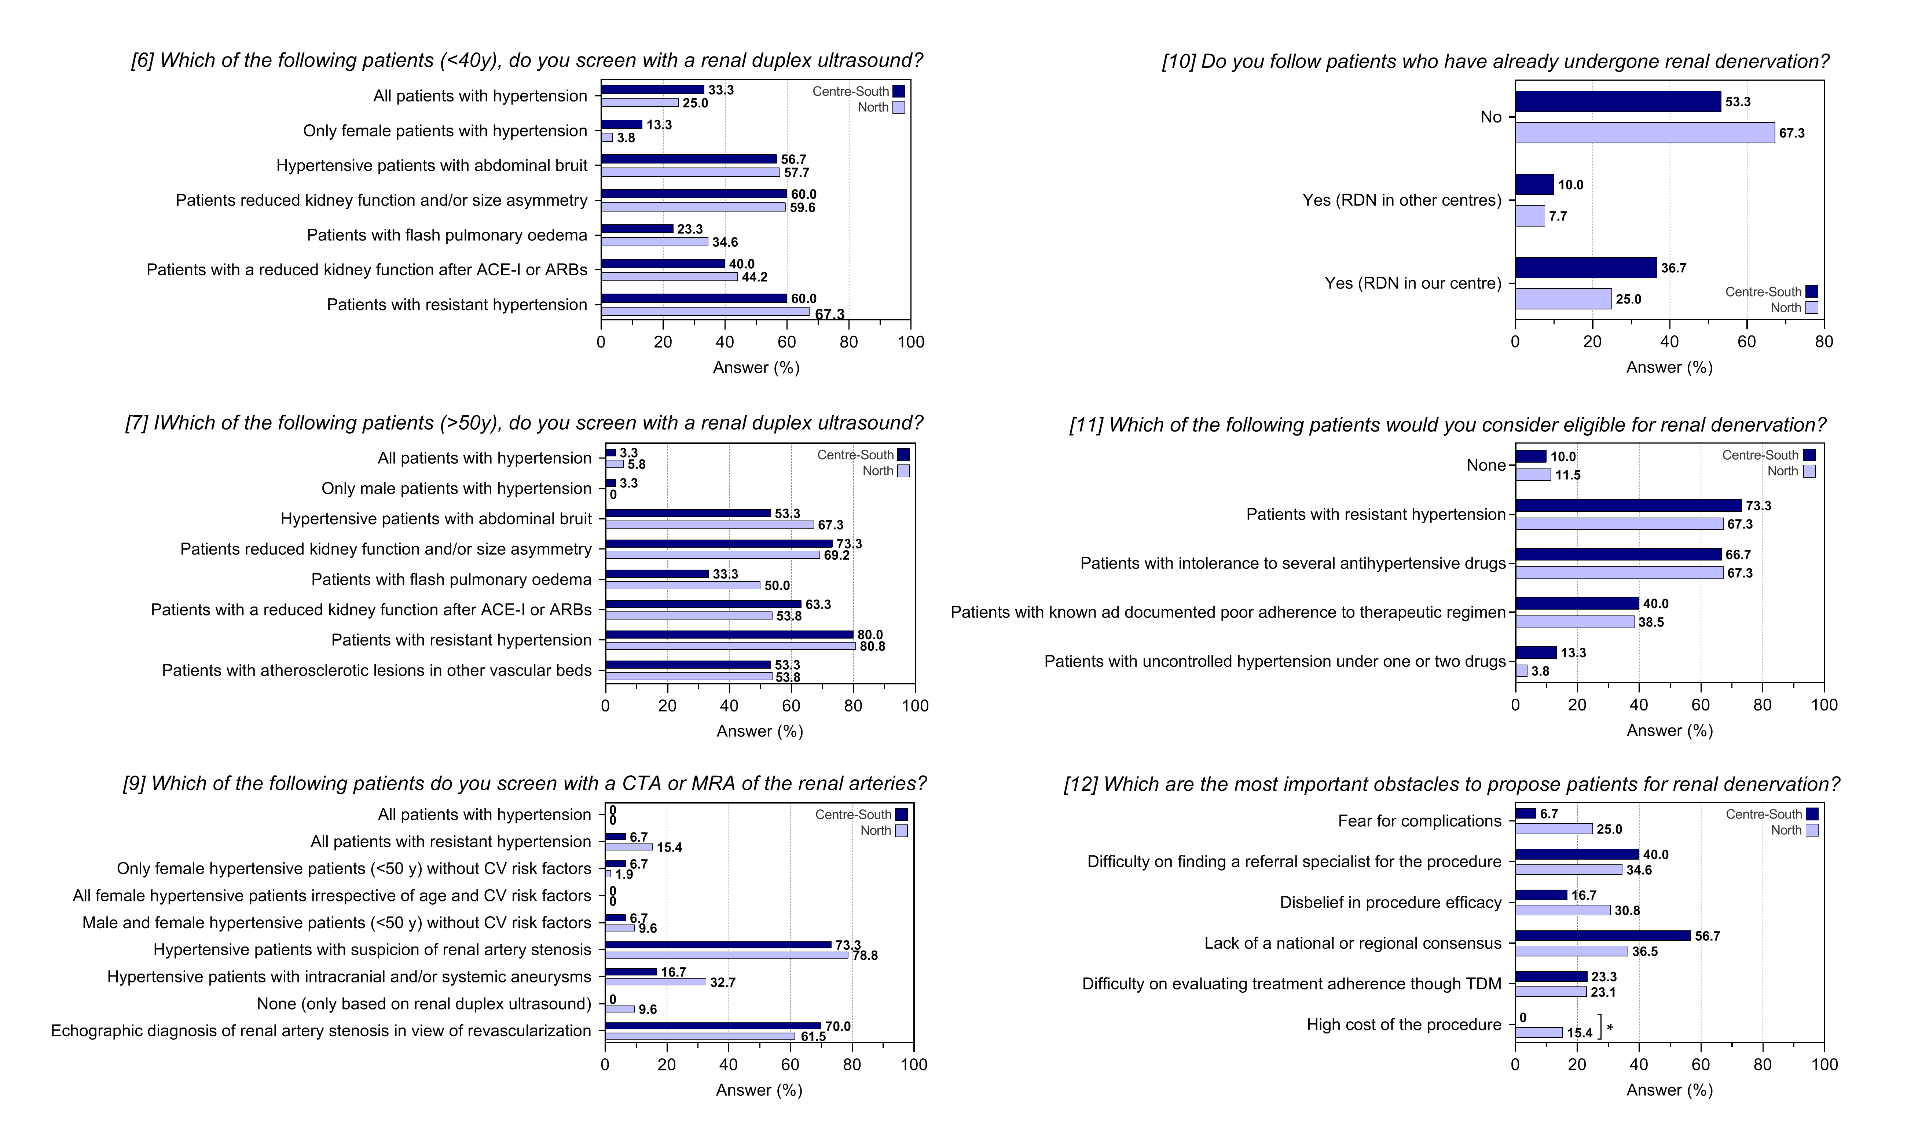


**Figure S2**. Response to questions 6-to-12 of the questionnaire after stratification for geographical distribution of the centres. Data are reported as frequencies.

ACE-Is = angiotensin I converting enzyme inhibitors; ARBs = angiotensin II receptor blockers; CTA = computed tomography angiography; MRA = magnetic resonance angiography
